# Supplementary material for: Molecular stacking effect on photoluminescence quantum yield and charge mobility of organic semiconductors
Source: Royal Society of Chemistry journal article supplement (doi:10.1039/c7cp05451c), 2017-01-01
Supplement: c7cp05451c1.pdf [file c7cp05451c1.pdf]

*Supporting Information for*

Molecular stacking effect on photoluminescence quantum yield  
and charge mobility of organic semiconductors

Jianzhong Fan, Lili Lin\*, Chuan-Kui Wang\*

Shandong Province Key Laboratory of Medical Physics and Image Processing Technology, Institute of  
Materials and Clean Energy, School of Physics and Electronics, Shandong Normal University, 250014  
Jinan, China

\*Author to whom correspondence should be addressed.

E-mail: [ckwang@sdu.edu.cn](mailto:ckwang@sdu.edu.cn) and [linll@sdu.edu.cn](mailto:linll@sdu.edu.cn).

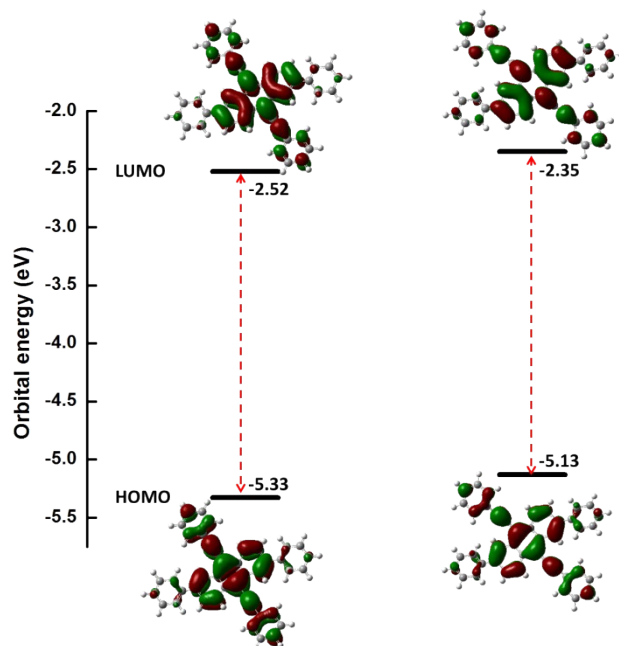

Figure S1. Spatial distributions of HOMO and LUMO as well as their orbital energies for DP-BPEA in THF (left) and solid phase (right) respectively.

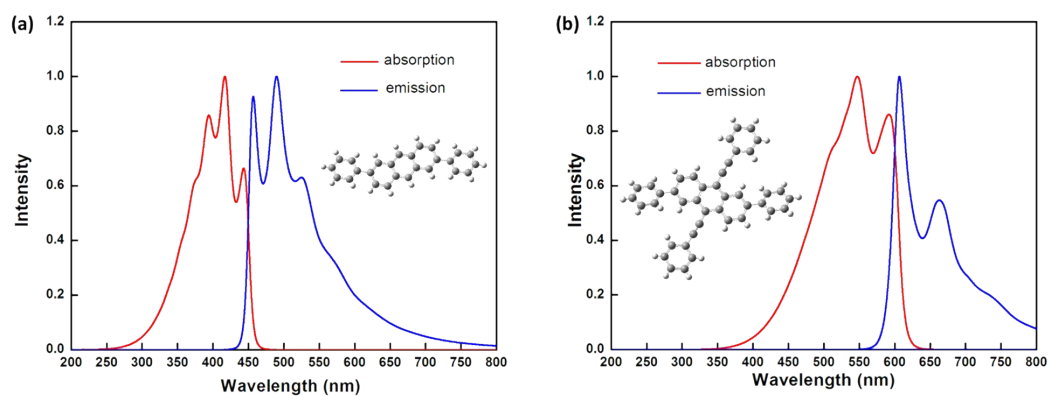

Figure S2. Vibronic resolved UV-vis (red line) and fluorescent (blue line) spectra of DPA (a) and DP-BPEA (b) in THF.

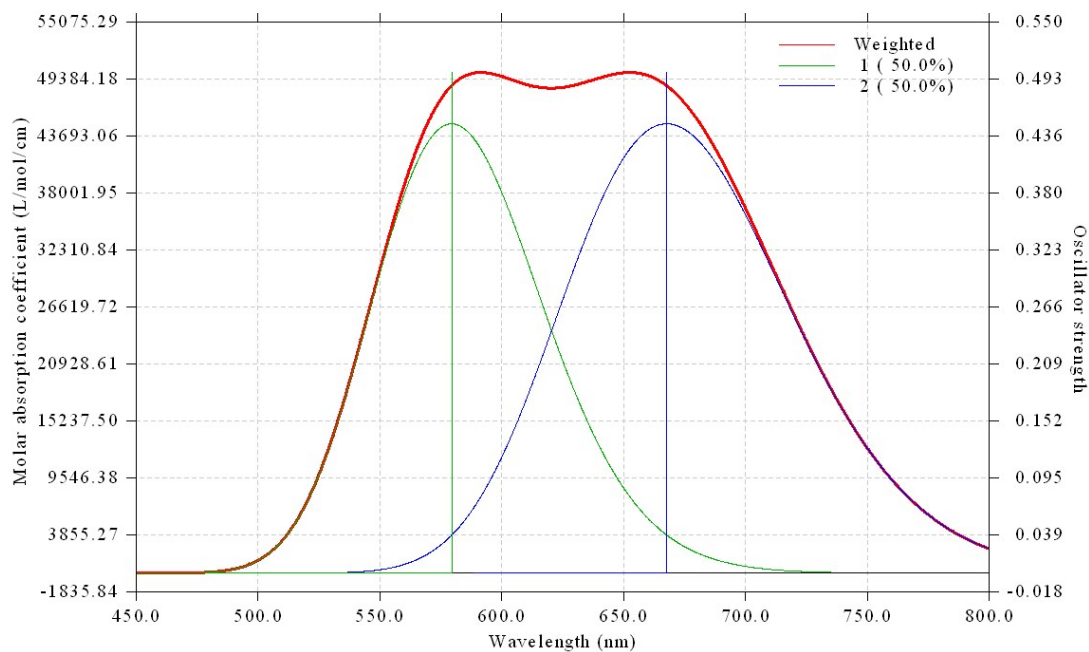

Figure S3. Weight fluorescence spectra (red line) of monomer (green line) and excimer (blue line) with the assumed ratio is 1:1.

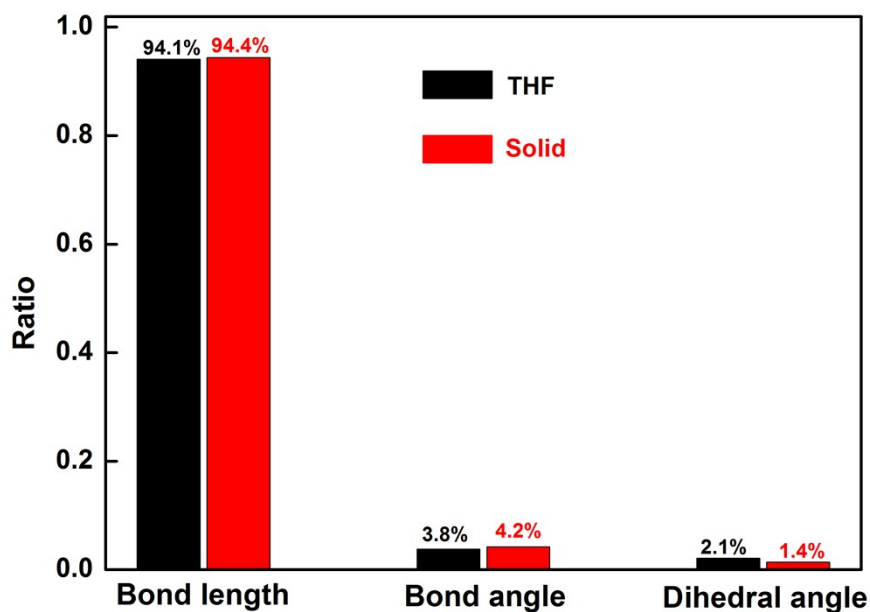

Figure S4. Contributions to the reorganization energies from bond length, bond angle and dihedral angle of DP-BPEA in THF (black) and solid phase (red).

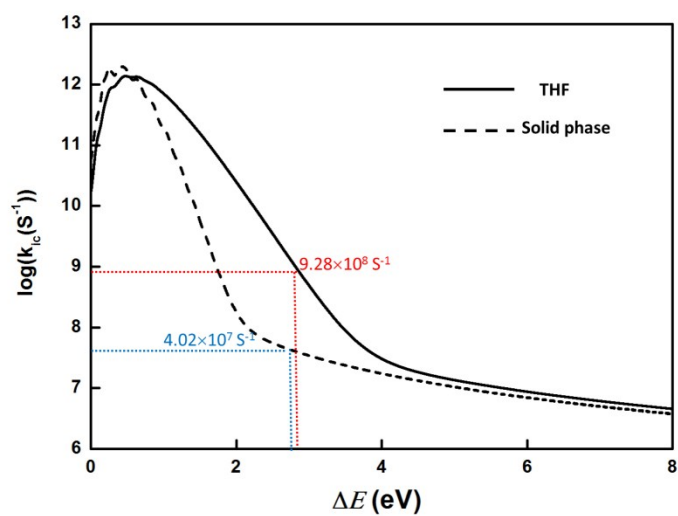

Figure S5. Internal conversion rate  $k_{IC}$  from S1 to S0 versus the energy gap  $\Delta E$  in both THF (solid line) and solid phase (dotted line) for DPA. The vertical line indicates the position of the adiabatic energy gap.

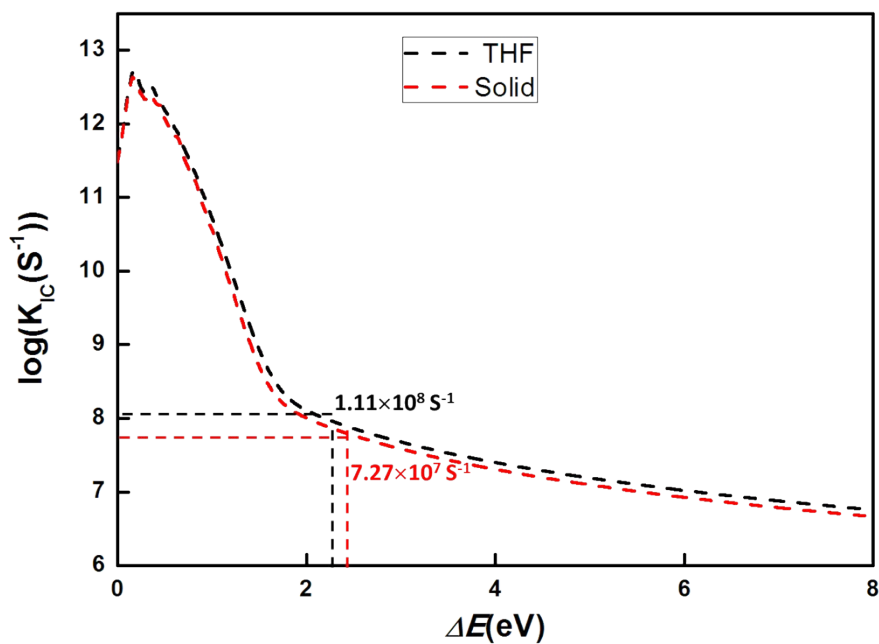

Figure S6. Internal conversion rate  $k_{IC}$  from S1 to S0 versus the energy gap  $\Delta E$  in both THF (black) and solid phase (red) for DP-BPEA. The vertical line indicates the position of the adiabatic energy gap.

Table S1. Calculated vertical excitation energy (VEE), oscillator strength ( $f$ ), electric transition dipole moment (EDM) and the assignment for S1 of DPA are listed.

|              | <b>VEE</b>     | <b><math>f</math></b> | <b>EDM</b> | <b>assignment</b> |
|--------------|----------------|-----------------------|------------|-------------------|
| <b>THF</b>   | 3.11eV (399nm) | 0.175                 | 3.85 D     | HOMO→LUMO (98.8%) |
| <b>Solid</b> | 3.01eV (412nm) | 0.185                 | 4.02 D     | HOMO→LUMO (98.3%) |

Table S2. Calculated vertical excitation energy (VEE), oscillator strength ( $f$ ), electric transition dipole moment (EDM) and the assignment for S1 of DP-BPEA are listed.

|              | <b>VEE</b>     | <b><math>f</math></b> | <b>EDM</b> | <b>assignment</b> |
|--------------|----------------|-----------------------|------------|-------------------|
| <b>THF</b>   | 2.36eV (526nm) | 0.772                 | 3.66 D     | HOMO→LUMO (99.8%) |
| <b>Solid</b> | 2.41eV (516nm) | 0.551                 | 3.06 D     | HOMO→LUMO (99.6%) |

Table S3. Reorganization energies (meV) from bond length, bond angle, and dihedral angle of DP-BPEA in THF and solid phase are listed respectively.

|                       | <b>THF</b> | <b>Solid</b> | <b><math>\Delta_{\text{THF-Solid}}</math></b> |
|-----------------------|------------|--------------|-----------------------------------------------|
| <b>Bond length</b>    | 144.6      | 122.5        | 22.1                                          |
| <b>Bond angle</b>     | 5.8        | 5.4          | 0.4                                           |
| <b>Dihedral angle</b> | 3.2        | 1.8          | 1.4                                           |
| <b>Total</b>          | 153.6      | 129.7        | 23.9                                          |
